# Supplementary material for: The host ubiquitin-dependent segregase VCP/p97 is required for the onset of human cytomegalovirus replication
Source: PLoS Pathog. 2017 May 11;13(5):e1006329. doi: 10.1371/journal.ppat.1006329 (PMC5426786; doi:10.1371/journal.ppat.1006329)
Supplement: S2 Table — Total read counts for each of the five exons for each condition are shown along with ratio to total calculations and differential between negative control and VCP knockdown samples. (XLSX) [file ppat.1006329.s013.xlsx]

## Sheet: Sheet1
24HPI		5	4	3	2	1	Total
read counts	siNeg	2011	34475	5614	2158	10	44268
	siVCP	1684	35803	5895	2673	12	46067
ratio to total	siNeg	0.0454278	0.778779	0.126818	0.0487485	0.000225897
	siVCP	0.0365555	0.777194	0.127966	0.0580242	0.00026049
	siVCP-siNeg	-0.0088724	-0.00158517	0.00114732	0.00927565	3.45933e-05
48HPI		5	4	3	2	1	Total
read counts	siNeg	7670	19191	3781	1593	39	32274
	siVCP	2271	11461	1965	788	15	16500
ratio to total	siNeg	0.237653	0.594627	0.117153	0.0493586	0.0012084
	siVCP	0.137636	0.694606	0.119091	0.0477576	0.000909091
	siVCP-siNeg	-0.100016	0.0999788	0.00193778	-0.00160104	-0.000299312
72HPI		5	4	3	2	1	Total
read counts	siNeg	11002	9242	2169	854	25	23292
	siVCP	2796	5800	1090	380	18	10084
ratio to total	siNeg	0.472351	0.396789	0.0931221	0.0366649	0.00107333
	siVCP	0.277271	0.575169	0.108092	0.0376835	0.00178501
	siVCP-siNeg	-0.19508	0.17838	0.0149699	0.00101851	0.000711676
