# Supplementary material for: The host ubiquitin-dependent segregase VCP/p97 is required for the onset of human cytomegalovirus replication
Source: PLoS Pathog. 2017 May 11;13(5):e1006329. doi: 10.1371/journal.ppat.1006329 (PMC5426786; doi:10.1371/journal.ppat.1006329)
Supplement: S5 Table — Read counts (FPKM) aligning to open reading frames of TB40E at 24, 48 and 72 HPI in control cells or VCP knockdown cells. Log2 ratios of read counts between VCP knockdown cells and control cells are shown. (XLSX) [file ppat.1006329.s016.xlsx]

## Sheet: Sheet1
				FPKM				FPKM				ratio siVCP/siNeg				Log2(Ratio)
Transcript	Gene ID		24HR-siNeg	48HR-siNeg	72HR-siNeg		24HR-siVCP	48HR-siVCP	72HR-siVCP		24HPI	48HPI	72HPI		24HPI	48HPI	72HPI
lcl|KF297339.1_gene_1	RL1		5.07754	18.9538	35.8955		4.04299	6.86274	8.64171		0.79625	0.362077	0.240746		-0.328707	-1.46563	-2.05441
lcl|KF297339.1_gene_2	RNA2.7		812.621	7371.58	17013.3		452.486	2231.24	5426.32		0.556823	0.302681	0.318946		-0.844709	-1.72413	-1.64862
lcl|KF297339.1_gene_3	RNA1.2		385.386	2151.92	5144.9		313.588	642.419	932.988		0.813698	0.298533	0.181342		-0.297434	-1.74404	-2.46321
lcl|KF297339.1_gene_4	RL8A		41.1165	171.445	354.821		24.195	57.1317	113.638		0.58845	0.333236	0.320269		-0.765009	-1.58538	-1.64265
lcl|KF297339.1_gene_5	RL9A		29.2397	191.216	499.3		23.564	58.8629	119.965		0.805891	0.307835	0.240266		-0.311344	-1.69977	-2.05729
lcl|KF297339.1_gene_6	RL10		6.24551	51.8739	200.733		5.05754	14.7161	41.9494		0.809788	0.28369	0.208981		-0.304384	-1.81761	-2.25856
lcl|KF297339.1_gene_7	RL11		15.5143	151.112	418.483		7.04403	39.364	158.467		0.454035	0.260496	0.37867		-1.13913	-1.94067	-1.40099
lcl|KF297339.1_gene_8	RL12		5.71492	50.1336	94.5037		2.48285	9.53411	37.8845		0.434451	0.190174	0.400878		-1.20274	-2.39461	-1.31876
lcl|KF297339.1_gene_9	RL13		26.7652	247.827	575.666		7.0155	51.6611	203.694		0.262113	0.208456	0.353841		-1.93174	-2.26218	-1.49883
lcl|KF297339.1_gene_10	UL1		4.35418	29.9208	156.717		2.02852	7.78326	27.0003		0.465879	0.260129	0.172287		-1.10197	-1.9427	-2.53711
lcl|KF297339.1_gene_11	UL2		25.0929	157.569	786.993		13.4969	49.4972	156.942		0.537877	0.31413	0.19942		-0.894651	-1.67056	-2.32612
lcl|KF297339.1_gene_12	UL4		1587.62	6710.19	4794.54		563.639	1527.41	1847.03		0.355021	0.227625	0.385236		-1.49402	-2.13527	-1.37619
lcl|KF297339.1_gene_13	UL5		1537.97	6175.86	4571.42		556.83	1504.85	1808.72		0.362055	0.243666	0.395658		-1.46572	-2.03702	-1.33767
lcl|KF297339.1_gene_14	UL6		79.705	369.888	272.045		26.6604	81.9464	108.777		0.334488	0.221544	0.399849		-1.57997	-2.17434	-1.32247
lcl|KF297339.1_gene_15	UL8		5.07708	42.9845	67.4748		2.81006	8.98905	18.6348		0.55348	0.209123	0.276174		-0.853398	-2.25758	-1.85635
lcl|KF297339.1_gene_16	UL7		4.69038	20.8705	35.2489		2.11086	3.97856	8.20797		0.45004	0.190631	0.232857		-1.15187	-2.39115	-2.10248
lcl|KF297339.1_gene_17	UL9		6.94524	50.6645	107.949		4.22438	12.3669	29.4638		0.608241	0.244094	0.272942		-0.717285	-2.03449	-1.87333
lcl|KF297339.1_gene_18	UL10		7.70596	53.7298	155.046		3.24174	14.8045	35.3256		0.42068	0.275536	0.227839		-1.24921	-1.85969	-2.13391
lcl|KF297339.1_gene_19	UL11		11.6889	74.5989	192.531		6.24886	23.1547	53.3307		0.534598	0.310389	0.276998		-0.903474	-1.68785	-1.85205
lcl|KF297339.1_gene_20	UL13		433.979	399.591	395.763		142.581	226.202	217.473		0.328544	0.566084	0.549503		-1.60584	-0.820912	-0.8638
lcl|KF297339.1_gene_21	UL14		17.0068	28.8209	56.9776		7.82262	14.9597	20.4148		0.45997	0.519057	0.358295		-1.12039	-0.946034	-1.48078
lcl|KF297339.1_gene_22	UL15A		23.2037	38.6317	85.9497		11.1449	22.1103	29.2217		0.480307	0.572336	0.339986		-1.05797	-0.805067	-1.55645
lcl|KF297339.1_gene_23	UL16		128.682	184.269	227.52		55.4759	103.988	137.515		0.431108	0.564327	0.604408		-1.21388	-0.825396	-0.726404
lcl|KF297339.1_gene_24	UL17		367.889	789.1	1048.1		190.431	422.023	618.131		0.517632	0.534816	0.589763		-0.950002	-0.902887	-0.761792
lcl|KF297339.1_gene_25	UL18		5.3424	16.6507	41.6043		3.30922	7.37568	14.0778		0.619426	0.442965	0.338374		-0.690997	-1.17473	-1.56331
lcl|KF297339.1_gene_26	UL19		15.7976	59.2142	150.697		7.0522	30.4515	80.8469		0.44641	0.51426	0.536486		-1.16356	-0.95943	-0.898386
lcl|KF297339.1_gene_27	UL20		24.2486	61.0308	128.326		20.7509	41.8198	76.6026		0.855757	0.685225	0.596937		-0.224728	-0.545351	-0.744348
lcl|KF297339.1_gene_28	UL21A		86.7129	120.987	136.981		71.1548	126.911	164.357		0.820579	1.04896	1.19985		-0.285286	0.0689651	0.262857
lcl|KF297339.1_gene_29	UL22A		626.503	2157.84	13139.1		463.615	1182.11	2247.44		0.740004	0.547821	0.17105		-0.434394	-0.868224	-2.54751
lcl|KF297339.1_gene_30	UL23		33.8917	100.307	253.864		31.6933	51.2745	73.2431		0.935135	0.511176	0.288513		-0.0967541	-0.968109	-1.79329
lcl|KF297339.1_gene_31	UL24		25.5524	86.6402	238.505		19.358	35.8534	54.4767		0.757581	0.413819	0.228409		-0.400529	-1.27293	-2.13031
lcl|KF297339.1_gene_32	UL25		28.6697	101.44	285.256		27.8179	49.2789	70.919		0.970289	0.485794	0.248615		-0.0435133	-1.04158	-2.00801
lcl|KF297339.1_gene_33	UL26		47.6352	102.298	157.357		54.6281	82.967	89.0111		1.1468	0.811032	0.565663		0.197615	-0.302168	-0.821984
lcl|KF297339.1_gene_34	UL27		40.2169	86.0878	133.65		40.8448	59.4867	63.6124		1.01561	0.691	0.475963		0.0223505	-0.533242	-1.07108
lcl|KF297339.1_gene_35	UL29		33.9714	86.4365	152.237		31.5787	49.8988	59.7037		0.929567	0.577289	0.392176		-0.105369	-0.792636	-1.35043
lcl|KF297339.1_gene_36	UL30		33.2009	204.931	813.294		34.8514	85.1676	135.728		1.04971	0.415592	0.166887		0.0699943	-1.26676	-2.58306
lcl|KF297339.1_gene_37	UL30A		71.3857	451.334	2242.35		69.5663	184.075	293.787		0.974513	0.407847	0.131017		-0.0372465	-1.2939	-2.93217
lcl|KF297339.1_gene_38	UL31		21.0865	135.743	447.253		18.4456	39.6612	73.5505		0.874759	0.292179	0.164449		-0.193043	-1.77508	-2.60428
lcl|KF297339.1_gene_39	UL32		14.2369	83.9304	298.155		11.575	25.8369	42.7856		0.813028	0.307837	0.143501		-0.298623	-1.69976	-2.80087
lcl|KF297339.1_gene_40	UL33		15.9271	95.243	214.542		13.2921	28.4066	48.6356		0.834559	0.298254	0.226695		-0.260915	-1.74539	-2.14118
lcl|KF297339.1_gene_41	UL34		29.4977	103.737	200.235		26.3471	54.8738	65.5018		0.893192	0.52897	0.327125		-0.162958	-0.918741	-1.61209
lcl|KF297339.1_gene_42	UL35		20.7372	50.9141	158.664		17.7492	30.6247	44.1829		0.855911	0.601497	0.278468		-0.224467	-0.73337	-1.84441
lcl|KF297339.1_gene_43	UL36		219.371	262.585	201.938		181.169	239.221	197.013		0.825857	0.911023	0.975611		-0.276037	-0.13444	-0.0356216
lcl|KF297339.1_gene_44	UL37		36.5947	69.5163	124.337		44.3964	53.6797	66.8043		1.21319	0.772189	0.537284		0.278808	-0.372975	-0.896243
lcl|KF297339.1_gene_45	UL38		128.229	179.912	193.886		166.463	210.218	221.964		1.29817	1.16845	1.14482		0.376479	0.224595	0.195117
lcl|KF297339.1_gene_46	UL40		693.491	1603.78	2496.34		433.381	636.678	832.115		0.624927	0.396986	0.333334		-0.678241	-1.33284	-1.58496
lcl|KF297339.1_gene_47	UL41A		286.48	1253.75	4030.84		145.56	392	531.625		0.508098	0.312662	0.131889		-0.97682	-1.67732	-2.9226
lcl|KF297339.1_gene_48	UL42		226.379	807.609	1723.35		136.54	291.068	391.773		0.603148	0.360407	0.227332		-0.729416	-1.4723	-2.13713
lcl|KF297339.1_gene_49	UL43		97.8945	368.797	831.494		51.949	124.652	177.413		0.530663	0.337996	0.213367		-0.914132	-1.56492	-2.22859
lcl|KF297339.1_gene_50	UL44		96.4569	368.935	902.673		46.9484	117.608	180.592		0.486729	0.318777	0.200064		-1.03881	-1.64938	-2.32147
lcl|KF297339.1_gene_51	UL45		34.8565	163.536	344.792		19.1703	44.8244	83.6543		0.549978	0.274095	0.242623		-0.862555	-1.86725	-2.04321
lcl|KF297339.1_gene_52	UL46		22.944	129.143	323.476		14.5909	34.5207	68.8219		0.635935	0.267306	0.212757		-0.653048	-1.90344	-2.23272
lcl|KF297339.1_gene_53	UL47		16.3333	94.8156	189.018		11.3706	25.8158	51.5898		0.696161	0.272274	0.272936		-0.522508	-1.87687	-1.87337
lcl|KF297339.1_gene_54	UL48		23.2205	101.734	196.053		15.2544	31.4138	55.67		0.656937	0.308784	0.283954		-0.606174	-1.69533	-1.81627
lcl|KF297339.1_gene_55	UL48A		226.729	691.726	1084.09		135.175	241.059	359.471		0.596196	0.348489	0.331588		-0.746141	-1.52081	-1.59254
lcl|KF297339.1_gene_56	UL49		52.715	167.819	224.66		33.7564	65.2706	92.5538		0.640357	0.388935	0.411973		-0.643052	-1.3624	-1.27938
lcl|KF297339.1_gene_57	UL50		51.4632	154.819	210.799		32.1038	64.0286	88.4048		0.623821	0.413571	0.41938		-0.680797	-1.27379	-1.25367
lcl|KF297339.1_gene_58	UL51		66.1707	211.756	301.895		41.9344	80.9172	126.357		0.633731	0.382125	0.418546		-0.658058	-1.38788	-1.25654
lcl|KF297339.1_gene_59	UL52		25.3719	83.6477	136.796		17.0653	31.3305	48.0003		0.672606	0.374553	0.35089		-0.572166	-1.41676	-1.51091
lcl|KF297339.1_gene_60	UL53		32.5772	126.233	195.181		18.216	47.8788	68.778		0.559164	0.379289	0.352381		-0.838656	-1.39863	-1.50479
lcl|KF297339.1_gene_61	UL54		44.1407	148.88	232.572		26.6399	64.9719	84.679		0.603522	0.436404	0.364098		-0.728521	-1.19626	-1.4576
lcl|KF297339.1_gene_62	UL55		52.9778	206.788	338.86		34.7276	83.8698	131.841		0.655512	0.405583	0.389072		-0.609305	-1.30193	-1.36189
lcl|KF297339.1_gene_63	UL56		35.5379	162.525	236.501		25.7549	65.4408	97.8106		0.724716	0.402651	0.413574		-0.464511	-1.3124	-1.27378
lcl|KF297339.1_gene_64	UL57		9.44194	24.8753	55.903		7.86465	14.421	18.6643		0.832949	0.579732	0.333869		-0.263701	-0.786543	-1.58264
lcl|KF297339.1_gene_65	RNA4.9		30.6627	462.469	1260.81		32.2178	64.1897	191.906		1.05072	0.138798	0.152209		0.0713732	-2.84894	-2.71588
lcl|KF297339.1_gene_66	UL69		18.6269	56.0602	125.536		14.5316	26.5984	39.0329		0.780141	0.474461	0.31093		-0.358194	-1.07564	-1.68534
lcl|KF297339.1_gene_67	UL70		6.10334	24.156	72.8913		5.90539	11.4932	18.2149		0.967567	0.475791	0.249891		-0.0475666	-1.0716	-2.00063
lcl|KF297339.1_gene_68	UL71		22.637	69.414	119.324		25.7748	46.4069	60.032		1.13861	0.668552	0.503101		0.187278	-0.580887	-0.991081
lcl|KF297339.1_gene_69	UL72		23.5557	87.7736	291.431		20.2903	35.8332	57.4078		0.861375	0.408246	0.196986		-0.215286	-1.29249	-2.34384
lcl|KF297339.1_gene_70	UL73		89.1384	267.875	566.748		67.9448	134.685	176.562		0.762239	0.50279	0.311535		-0.391684	-0.991971	-1.68253
lcl|KF297339.1_gene_71	UL74		10.9188	38.1223	154.38		10.3642	17.5406	28.7105		0.949207	0.460114	0.185973		-0.0752055	-1.11994	-2.42684
lcl|KF297339.1_gene_72	UL74A		336.588	1308.47	2209.53		345.616	782.31	1172.18		1.02682	0.597881	0.530511		0.0381863	-0.742069	-0.914545
lcl|KF297339.1_gene_73	UL75		20.0295	94.8396	230.541		18.5846	34.4728	60.6543		0.927861	0.363485	0.263096		-0.108019	-1.46003	-1.92634
lcl|KF297339.1_gene_74	UL76		10.4348	55.0529	142.258		10.289	19.4614	32.5466		0.986028	0.353504	0.228786		-0.0203002	-1.5002	-2.12793
lcl|KF297339.1_gene_75	UL77		9.79892	46.1444	119.538		8.36484	18.3946	29.5927		0.853649	0.398631	0.247559		-0.228285	-1.32687	-2.01416
lcl|KF297339.1_gene_76	UL78		52.5631	155.147	261.69		34.9304	78.5687	99.5278		0.664542	0.506415	0.380327		-0.589567	-0.981609	-1.39469
lcl|KF297339.1_gene_77	UL79		18.8554	61.6874	128.98		13.6453	25.6326	33.6195		0.723681	0.415524	0.260657		-0.466574	-1.267	-1.93978
lcl|KF297339.1_gene_78	UL80		18.1667	68.8527	184.471		14.3875	31.8731	38.3894		0.791971	0.462917	0.208105		-0.33648	-1.11117	-2.26461
lcl|KF297339.1_gene_79	UL80.5		22.5781	104.733	394.225		20.3868	41.8042	56.6991		0.902946	0.39915	0.143824		-0.147289	-1.325	-2.79762
lcl|KF297339.1_gene_80	UL82		24.6554	75.018	188.264		28.1317	41.3969	58.5023		1.141	0.551826	0.310746		0.190293	-0.857714	-1.68619
lcl|KF297339.1_gene_81	UL83		23.4111	66.5914	119.188		23.6455	32.8447	46.1621		1.01001	0.493227	0.387305		0.0143729	-1.01968	-1.36846
lcl|KF297339.1_gene_82	UL84		45.8881	219.329	542.28		32.372	78.1086	128.232		0.705455	0.356125	0.236468		-0.503374	-1.48954	-2.08028
lcl|KF297339.1_gene_83	UL85		7.78493	76.1285	311.397		6.7932	14.7302	31.0544		0.872609	0.193491	0.0997261		-0.196593	-2.36966	-3.32589
lcl|KF297339.1_gene_84	UL86		6.47015	51.8945	213.765		6.02827	10.9879	20.4909		0.931705	0.211735	0.0958571		-0.102055	-2.23967	-3.38297
lcl|KF297339.1_gene_85	UL87		9.3996	68.6154	158.075		7.94189	16.5036	29.0824		0.844918	0.240523	0.183978		-0.243117	-2.05575	-2.44239
lcl|KF297339.1_gene_86	UL88		9.54795	78.1864	164.742		8.0838	16.3974	30.0779		0.846653	0.209722	0.182576		-0.240157	-2.25345	-2.45343
lcl|KF297339.1_gene_87	UL89		16.2221	99.719	236.603		13.3192	24.3277	46.1867		0.821053	0.243963	0.195208		-0.284453	-2.03527	-2.35692
lcl|KF297339.1_gene_88	UL91		11.2034	64.7693	157.036		10.5297	16.8687	31.2335		0.939866	0.260443	0.198894		-0.0894723	-1.94096	-2.32993
lcl|KF297339.1_gene_89	UL92		11.8303	71.4783	174.108		8.27315	18.9985	31.286		0.699319	0.265794	0.179693		-0.515978	-1.91162	-2.47639
lcl|KF297339.1_gene_90	UL93		11.7503	63.0892	144.933		9.62973	19.0307	31.3454		0.819531	0.301648	0.216275		-0.28713	-1.72906	-2.20906
lcl|KF297339.1_gene_91	UL94		37.2343	150.411	345.812		34.6278	53.5019	86.8356		0.929997	0.355705	0.251106		-0.104702	-1.49125	-1.99363
lcl|KF297339.1_gene_92	UL95		23.706	111.961	296.257		18.1293	31.4045	50.6006		0.764756	0.280495	0.1708		-0.386929	-1.83395	-2.54962
lcl|KF297339.1_gene_93	UL96		76.1375	232.565	481.918		59.5814	89.8606	118.831		0.78255	0.386389	0.246579		-0.353745	-1.37187	-2.01988
lcl|KF297339.1_gene_94	UL97		40.0242	119.585	252.239		28.9531	52.196	62.26		0.72339	0.436476	0.246829		-0.467155	-1.19603	-2.01841
lcl|KF297339.1_gene_95	UL98		46.9856	132.406	292.723		33.8553	60.7883	72.6042		0.720546	0.459105	0.24803		-0.472837	-1.1231	-2.01141
lcl|KF297339.1_gene_96	UL99		86.3528	234.883	633.13		58.5634	103.745	136.71		0.678188	0.441688	0.215927		-0.560244	-1.1789	-2.21138
lcl|KF297339.1_gene_97	UL100		19.5418	107.483	759.002		14.9484	30.2278	60.9744		0.764945	0.281233	0.080335		-0.386572	-1.83016	-3.63783
lcl|KF297339.1_gene_98	UL102		25.6126	85.0348	471.543		18.0734	32.6633	51.838		0.705645	0.384117	0.109933		-0.502986	-1.38038	-3.18531
lcl|KF297339.1_gene_99	UL103		25.089	67.4697	142.633		20.8939	30.841	38.9086		0.832791	0.457109	0.272788		-0.263973	-1.12939	-1.87415
lcl|KF297339.1_gene_100	UL104		10.7585	31.8396	73.0847		6.18146	12.6849	19.2649		0.574565	0.3984	0.263597		-0.799457	-1.32771	-1.92359
lcl|KF297339.1_gene_101	UL105		31.8657	68.9437	87.4782		16.5922	33.5586	43.8525		0.520692	0.486754	0.501296		-0.941499	-1.03874	-0.996264
lcl|KF297339.1_gene_102	RNA5.0		30.1479	321.247	2027.78		24.5883	52.2275	127.797		0.815589	0.162577	0.0630231		-0.294086	-2.6208	-3.98798
lcl|KF297339.1_gene_103	UL111A		8.35407	18.1875	30.4998		5.07589	14.8238	28.7495		0.607595	0.815054	0.942613		-0.718818	-0.295032	-0.0852629
lcl|KF297339.1_gene_104	UL112		73.6385	178.357	304.479		126.424	211.487	199.115		1.71682	1.18575	0.653953		0.779738	0.245801	-0.612741
lcl|KF297339.1_gene_105	UL114		39.1104	92.1618	211.144		31.7894	54.8633	60.6741		0.812812	0.595293	0.287359		-0.299007	-0.748327	-1.79907
lcl|KF297339.1_gene_106	UL115		37.5422	123.426	330.837		29.06	60.3049	88.1713		0.774062	0.488592	0.26651		-0.369478	-1.0333	-1.90774
lcl|KF297339.1_gene_107	UL116		39.8646	133.796	337.59		28.7068	59.8424	86.4733		0.720108	0.447266	0.256149		-0.473716	-1.1608	-1.96495
lcl|KF297339.1_gene_108	UL117		24.2819	80.447	210.939		19.0285	38.3325	53.5201		0.78365	0.476494	0.253723		-0.351719	-1.06947	-1.97867
lcl|KF297339.1_gene_109	UL119		30.1813	110.632	284.849		19.6662	39.564	59.9384		0.651602	0.357618	0.210422		-0.617937	-1.48351	-2.24864
lcl|KF297339.1_gene_110	UL120		15.179	43.2132	108.513		14.8665	20.856	25.5248		0.979412	0.48263	0.235223		-0.0300117	-1.05101	-2.0879
lcl|KF297339.1_gene_111	UL121		15.3997	43.3078	114.036		16.1622	27.1304	35.3319		1.04951	0.626455	0.309831		0.0697213	-0.674717	-1.69045
lcl|KF297339.1_gene_112	UL122		15.1838	51.9272	96.4359		19.9021	21.7313	29.2483		1.31075	0.418496	0.303293		0.390388	-1.25672	-1.72122
lcl|KF297339.1_gene_113	UL123		235.013	135.421	100.143		407.904	103.816	64.8902		1.73567	0.766617	0.647975		0.795489	-0.383423	-0.625989
lcl|KF297339.1_gene_114	UL124		32.4524	90.8458	232.591		38.1996	41.087	57.7252		1.1771	0.452272	0.248183		0.235232	-1.14474	-2.01052
lcl|KF297339.1_gene_115	UL130		36.622	89.6039	172.181		29.7985	44.086	59.215		0.813678	0.49201	0.343911		-0.297471	-1.02324	-1.53989
lcl|KF297339.1_gene_116	UL131A		28.9634	72.8685	120.957		23.2341	34.0378	45.5011		0.802188	0.467113	0.376176		-0.317987	-1.09816	-1.41052
lcl|KF297339.1_gene_117	UL132		346.696	984.445	1841.81		175.361	306.908	406.411		0.505806	0.311757	0.220658		-0.983343	-1.6815	-2.18011
lcl|KF297339.1_gene_118	UL148		254.947	605.46	937.551		113.707	197.268	250.048		0.446003	0.325815	0.266703		-1.16488	-1.61787	-1.90669
lcl|KF297339.1_gene_119	UL147A		218.994	443.801	798.915		105.816	148.669	199.054		0.483191	0.33499	0.249155		-1.04933	-1.57781	-2.00488
lcl|KF297339.1_gene_120	UL147		40.9189	109.563	273.868		18.2428	29.7817	47.441		0.445828	0.271823	0.173226		-1.16544	-1.87926	-2.52927
lcl|KF297339.1_gene_121	UL146		5.98476	50.5018	176.374		4.3388	7.68895	17.2203		0.724975	0.152251	0.0976351		-0.463997	-2.71548	-3.35646
lcl|KF297339.1_gene_122	UL145		427.582	1018.87	1359.12		182.504	407.149	884.001		0.426828	0.399608	0.650422		-1.22827	-1.32334	-0.620553
lcl|KF297339.1_gene_123	UL144		51.6261	159.579	319.559		18.2677	90.4987	335.885		0.353846	0.567109	1.05109		-1.49881	-0.818302	0.071885
lcl|KF297339.1_gene_124	UL142		3.17855	21.5091	64.7313		2.62295	4.477	9.26405		0.825203	0.208144	0.143115		-0.277178	-2.26434	-2.80475
lcl|KF297339.1_gene_125	UL141		32.08	152.336	554.298		24.3028	59.4709	126.432		0.757569	0.390393	0.228094		-0.400552	-1.357	-2.1323
lcl|KF297339.1_gene_126	UL140		26.6145	113.066	483.394		19.594	39.7909	90.8248		0.736215	0.351926	0.18789		-0.441801	-1.50665	-2.41204
lcl|KF297339.1_gene_127	UL139		27.9893	137.019	524.715		23.2637	46.2119	104.599		0.831164	0.337266	0.199344		-0.266795	-1.56804	-2.32666
lcl|KF297339.1_gene_128	UL138		500.949	865.309	1162.64		353.668	513.563	501.38		0.705996	0.593502	0.431243		-0.502268	-0.752674	-1.21343
lcl|KF297339.1_gene_129	UL136		387.224	654.231	931.492		247.785	386.732	371.193		0.639901	0.591125	0.398493		-0.64408	-0.758466	-1.32737
lcl|KF297339.1_gene_130	UL135		259.471	399.969	558.97		149.509	236.051	213.351		0.576207	0.590173	0.381686		-0.795341	-0.76079	-1.38954
lcl|KF297339.1_gene_131	UL133		112.15	310.373	434.067		43.8407	127.778	144.81		0.390911	0.411692	0.333612		-1.35509	-1.28036	-1.58376
lcl|KF297339.1_gene_132	UL148A		155.823	603.261	1044.9		64.7149	212.547	279.636		0.41531	0.35233	0.26762		-1.26774	-1.505	-1.90174
lcl|KF297339.1_gene_133	UL148B		65.5708	385.565	722.992		39.8674	93.4808	149.217		0.608005	0.242451	0.206388		-0.717844	-2.04423	-2.27657
lcl|KF297339.1_gene_134	UL148C		71.9107	423.012	734.855		44.4402	101.48	163.615		0.617991	0.239899	0.222649		-0.694341	-2.0595	-2.16715
lcl|KF297339.1_gene_135	UL148D		193.074	732.351	1093.82		140.767	290.655	366.459		0.729083	0.396879	0.335027		-0.455845	-1.33323	-1.57765
lcl|KF297339.1_gene_136	UL150		40.7676	172.446	267.814		30.2459	62.194	86.2774		0.74191	0.360658	0.322154		-0.430683	-1.4713	-1.63418
lcl|KF297339.1_gene_137	UL150A		35.5475	100.72	97.2347		23.5575	51.5404	64.321		0.662705	0.51172	0.661503		-0.593562	-0.966575	-0.596181
lcl|KF297339.1_gene_144	US7		8.83714	15.4614	29.5121		6.56832	8.73046	11.113		0.743263	0.564662	0.376557		-0.428055	-0.824541	-1.40906
lcl|KF297339.1_gene_145	US8		95.9497	240.695	287.33		78.1596	108.656	117.752		0.814589	0.451426	0.409814		-0.295855	-1.14744	-1.28696
lcl|KF297339.1_gene_146	US9		111.632	276.644	356.491		87.4181	124.231	136.67		0.783092	0.449065	0.383376		-0.352747	-1.15501	-1.38317
lcl|KF297339.1_gene_147	US10		162.825	149.477	108.213		84.9995	107.387	105.873		0.52203	0.718418	0.978376		-0.937796	-0.477104	-0.0315391
lcl|KF297339.1_gene_148	US11		123.839	112.347	84.709		62.1243	78.3888	81.6492		0.501654	0.697738	0.963879		-0.995236	-0.519242	-0.0530765
lcl|KF297339.1_gene_149	US12		230.287	487.074	464.785		120.445	260.622	328.055		0.523021	0.535077	0.705821		-0.935058	-0.902182	-0.502626
lcl|KF297339.1_gene_150	US13		149.334	360.442	395.093		74.947	164.257	217.661		0.501875	0.45571	0.550911		-0.9946	-1.13381	-0.860109
lcl|KF297339.1_gene_151	US14		69.1403	228.071	292.311		33.7161	74.7107	123.59		0.487648	0.327577	0.422803		-1.03609	-1.6101	-1.24194
lcl|KF297339.1_gene_152	US15		59.4344	207.956	286.822		30.7867	68.7059	110.994		0.517995	0.330387	0.386979		-0.948991	-1.59777	-1.36967
lcl|KF297339.1_gene_153	US16		38.4927	165.71	267.321		16.0619	40.3804	75.9719		0.417271	0.243681	0.284197		-1.26094	-2.03693	-1.81504
lcl|KF297339.1_gene_154	US17		7.84517	66.2158	167.092		5.1883	16.6928	37.586		0.661337	0.252097	0.224942		-0.596543	-1.98795	-2.15238
lcl|KF297339.1_gene_155	US18		348.301	870.666	855.33		199.952	556.164	689.897		0.574078	0.63878	0.806586		-0.800681	-0.646609	-0.3101
lcl|KF297339.1_gene_156	US19		173.395	496.863	460.907		90.8792	307.563	345.659		0.524117	0.61901	0.749954		-0.93204	-0.691966	-0.415126
lcl|KF297339.1_gene_157	US20		195.131	540.632	510.698		104.641	322.458	374.281		0.53626	0.596446	0.732881		-0.898995	-0.745536	-0.448349
lcl|KF297339.1_gene_158	US21		11.8761	67.4135	130.437		9.28017	22.6228	44.614		0.781416	0.335583	0.342035		-0.355838	-1.57526	-1.54778
lcl|KF297339.1_gene_159	US22		126.156	281.836	449.91		95.4159	141.308	160.639		0.756333	0.501384	0.357047		-0.402907	-0.996013	-1.48581
lcl|KF297339.1_gene_160	US23		42.6399	127.518	319.457		26.9073	56.6554	73.6988		0.631036	0.444293	0.2307		-0.664206	-1.17042	-2.11591
lcl|KF297339.1_gene_161	US24		29.1574	123.619	314.623		28.239	47.9889	68.0561		0.968502	0.3882	0.21631		-0.0461731	-1.36513	-2.20883
lcl|KF297339.1_gene_162	US26		30.62	158.004	273.94		23.4496	49.175	80.5106		0.765826	0.311226	0.293899		-0.384911	-1.68396	-1.76661
lcl|KF297339.1_gene_163	US27		26.5536	223.971	531.958		19.6438	48.7137	98.6613		0.739779	0.2175	0.185468		-0.434833	-2.20091	-2.43076
lcl|KF297339.1_gene_164	US28		106.238	540.564	843.947		54.5134	162.493	266.296		0.513125	0.300599	0.315536		-0.962617	-1.73409	-1.66412
lcl|KF297339.1_gene_165	US29		16.481	82.727	230.137		13.4961	24.5184	51.8071		0.818888	0.296377	0.225114		-0.288261	-1.75449	-2.15127
lcl|KF297339.1_gene_166	US30		30.1615	130.154	376.763		26.1671	47.7585	101.298		0.867566	0.366938	0.268864		-0.204954	-1.44639	-1.89505
lcl|KF297339.1_gene_167	US31		73.429	219.123	500.162		46.5893	90.2299	138.308		0.634481	0.411777	0.276526		-0.656351	-1.28006	-1.85451
lcl|KF297339.1_gene_168	US32		58.6373	203.013	517.898		36.8947	73.8502	118.425		0.629202	0.363771	0.228665		-0.668405	-1.4589	-2.12869
lcl|KF297339.1_gene_169	US33A		329.064	438.513	742.917		264.214	326.296	306.738		0.802926	0.744097	0.412883		-0.316661	-0.426438	-1.27619
lcl|KF297339.1_gene_170	US34		139.078	176.769	690.487		107.298	127.968	128.043		0.771495	0.723928	0.185439		-0.374271	-0.466082	-2.43099
lcl|KF297339.1_gene_171	US34A		220.91	294.484	1189.48		169.337	197.54	205.503		0.766543	0.6708	0.172767		-0.383561	-0.576044	-2.5331
lcl|KF297339.1_gene_172	TRS1		3.43384	26.1606	39.7909		3.21085	8.05676	11.6437		0.935061	0.307973	0.292622		-0.0968675	-1.69912	-1.77289
